# Supplementary material for: Contributions of Composition and Interactions to Bacterial Respiration Are Reliant on the Phylogenetic Similarity of the Measured Community
Source: PubMed Central journal article supplement (PMC5579169; doi:10.1007/s00248-017-0982-2), 2017-04-27
Supplement: 248_2017_982_MOESM1_ESM.pdf [file 248_2017_982_MOESM1_ESM.pdf]

1 **Supplementary Materials**

2  
3 **Journal:** Microbial Ecology – NOTES

4 **Title:** Contributions of composition and interactions to bacterial respiration are reliant on the  
5 phylogenetic similarity of the measured community

6 **Authors:** Damian W. Rivett<sup>1</sup>†, Andrew K. Lilley<sup>1</sup>, Gary J. Connett<sup>2</sup>, Mary P. Carroll<sup>2</sup>, Julian P.  
7 Legg<sup>2</sup>, Kenneth D. Bruce<sup>1</sup>.

8 **Affiliations:** 1. Institute of Pharmaceutical Science, Franklin-Wilkins Building, King's College  
9 London, UK. 2. UK National Institute for Health Research, Southampton Respiratory Biomedical  
10 Research Unit, University Hospital Southampton NHS Foundation Trust, Southampton UK. †Current  
11 address: Division of Ecology & Evolution, Imperial College London, Silwood Park campus, Ascot,  
12 UK.

13 **Corresponding author:** Andrew K. Lilley, Institute of Pharmaceutical Science, Franklin-Wilkins  
14 Building, King's College London, UK. Email: andy.lilley@kcl.ac.uk Tel: 020 7848 4670

15  
16  
17  
18  
19  
20  
21  
22  
23  
24  
25  
26  
27  
28  
29  
30  
31

1 **Table S1 Taxonomic identities of the bacterial isolates that were used to create the**  
2 **multispecies communities.**

3

**Taxonomic identifier**

*Acinetobacter baumannii*

*Achromobacter xylosoxidans*

*Burkholderia cepacia*

*Enterococcus faecium*

*Pseudomonas aeruginosa*

*Serratia marcescens*

*Staphylococcus aureus*

*Staphylococcus haemolyticus*

*Stenotrophomonas maltophilia*

*Streptococcus mitis*

*Streptococcus pneumoniae*

*Streptococcus sanguinis*

4

5

6

7

8

9

10

11

12

13

14

15 **Table S2 Binary utilisation profiles, for all the isolates used in this study, of the single**  
16 **carbon source present in the EcoPlate™ system. A positive result (“+”) indicates a value**  
17 **greater than an OD600 = 0.06 above the bacterial respiration in negative control (water).**

18

19 See Table S2.

20

21

22

23

24

## 1 **Supplementary Methods:**

### 2 **Profiling of bacterial isolates**

3 Bacterial isolates used in this study were isolated directly from expectorated sputa, after treatment  
4 with an equal volume of Sputasol (Oxoid Ltd., Basingstoke, UK), on three solid bacterial growth  
5 media; Mueller-Hinton (MH), Blood, and *Pseudomonas* selective agar with C-N supplement added  
6 (all purchased from Oxoid Ltd.) after 36 hours of aerobic incubation at 33°C shaken at 150 rpm.  
7 Colonies were selected at random and subsequent pure cultures were archived at -80°C (Protect™  
8 tubes, Technical Service Consultants Ltd, Heywood, UK) until use. Identification of the isolates was  
9 achieved by single extension sequences (performed by Macrogen Ltd., Amsterdam, Netherlands) of  
10 16S rRNA genes and comparison with GenBank reference sequences. Genomic DNA was extracted  
11 using a phenol: chloroform extraction protocol with the subsequent PCR amplification [15] of the  
12 16S rRNA gene using the universal primer set 8f (5'-AGA GTT TGA TCC TGG CTC AG-3') and  
13 pH' (5'-AAG GAG GTG ATC CAG CCG CA-3'). Composition of experimental microcosms  
14 (described below) using was determined at the end of the experiment using Terminal-Restriction  
15 Fragment (T-RF) profiling as previously described [15]. If two isolates could not be distinguished the  
16 relative abundance was shared equally between them [10]. Carbon utilisation profiles were measured  
17 using an EcoPlate™ (Biolog, Hayward, CA, USA), incubated at 37°C with optical density at a  
18 wavelength of 590 (OD<sub>590</sub>) recorded using a SpectraMax 190 spectrophotometer (Molecular Devices,  
19 Sunnyvale, CA, USA) after 24 hours post-inoculation. Readings were converted to a binary matrix (0,  
20 1) for analysis.

### 21 **Assembly of bacterial microcosms**

22 Archived isolates (n = 23) were inoculated into MH broth (Oxoid Ltd.) and incubated at 37°C with  
23 shaking at 110 rpm overnight, which was subsequently split into two replicate cultures. Bacterial  
24 suspensions were washed twice, resuspended, and diluted to an OD<sub>600</sub> of 0.1 using 1x M9 salts  
25 (Sigma-Aldrich, Gillingham, UK). Mixtures of bacteria were created prior to inoculation with the  
26 concentration of cells in each microcosm kept constant at an equivalent OD<sub>600</sub> = 0.02 (~1x10<sup>5</sup> total

1 colony forming units) regardless of the number of isolates present; each isolate was inoculated at an  
2 OD<sub>600</sub> equivalent to an OD<sub>600</sub> of 0.02 divided between the number of isolates within a given  
3 microcosm.

4 The microcosms were assembled as described by the Random Partitions Design [14] where, within  
5 each set of species combinations, a total of 28 microcosms were created containing either 1, 2, 3, 4, 6  
6 or 12 isolates, with each present once at each richness level. Two pools of isolates were used in this  
7 study, one using a mixture of bacterial species and the other using 12 phylogenetically  
8 indistinguishable *P. aeruginosa* isolates (one *P. aeruginosa* isolate was used in both pools). The  
9 medium used in this study was M9 salts supplemented with 30 mg ml<sup>-1</sup> Tryptone water (Oxoid Ltd.).

10

#### 11 **Measurement of CO<sub>2</sub> production**

12 CO<sub>2</sub> production measurements were performed using an adaptation of the MicroResp™ Soil  
13 Respiration System (Macaulay Scientific Consulting Ltd., Aberdeen, UK). The concentrations of the  
14 reagents in the Cresol Red indicator plate were: deionised water-1% (w/v) agarose (Bioline, London,  
15 UK), 150 mM KCl (Sigma-Aldrich), 5 mM NaHCO<sub>3</sub> (Sigma-Aldrich) and 12.5 µg/ml Cresol Red  
16 (VWR International Ltd., Lutterworth, UK). All indicator plate absorbance readings ( $\lambda = 572$  nm)  
17 were taken using a Spectramax 190 plate spectrophotometer (Molecular Devices, LLC., CA, USA).  
18 The calibration of the indicator system was undertaken by exposing the indicator to differing CO<sub>2</sub>  
19 levels and a calibration curve of absorbance against %CO<sub>2</sub> was fitted ( $r^2 = 0.928$ ) to a linear model  
20 with log-log transformed variables with these values converted to mass (µg) of CO<sub>2</sub> produced by the  
21 microcosm over a 24 hour period (µgCO<sub>2</sub> d<sup>-1</sup>).

22

#### 23 **Statistical analyses**

24 These data were analysed using a general linear model adapted from Bell *et al.* [14] applying the  
25 Random Partitions Design framework. This general linear model included seven explanatory variables

1 (plus random error,  $e$ );  $y = \alpha + \beta_{LR}x_{LR} + \left(\sum_1^{12} \beta_C x_C\right) + \beta_I x_I + \beta_{PSP} x_{PSP} + \beta_{MV} x_{MV} + e$ , where,  $\alpha$   
2 is the model intercept,  $\beta$  is the linear model coefficient and  $x$  is the respective coding assigned to each  
3 variable;  $LR$  represents the number of isolates in a microcosm and  $C$  is the composition of species in a  
4 microcosm, with  $I$  representing the interactions between isolates at a given richness level.  $PSP$   
5 (partitioned species pool) and  $MV$  (microcosm variance) are statistical variables required for the  
6 analysis as denominators for the F-ratio [14]. ANOVA was applied, with the appropriate F-  
7 denominator, to determine whether any of these variables had a significant effect on the total  
8 productivity. This general linear model was applied after confirmation of the assumptions of  
9 normality and variance homogeneity for the full model. Predicted values were calculated as  
10 previously described [10];  $P_{predicted} = \sum_1^N (ra_i M_i)$ , where  $N$  is the number of isolates in the  
11 microcosm,  $ra_i$  is the relative abundance of the  $i$ th isolate in the microcosm (this value was 1 divided  
12 by the level of  $I$  to represent the isolates being equivalent) and  $M_i$  is the functioning observed for the  
13  $i$ th isolate in monoculture. Distance measures between the isolates, based upon binary carbon source  
14 utilisation profiles, were calculated using Jaccard's distance in the  $R$  package *vegan* v2.3-4  
15 (<https://cran.r-project.org/package=vegan>). Significant (where  $\alpha < 0.05$ ) differences between  
16 treatments were analysed using both non-parametric tests and parametric statistics with the type of  
17 test used stated in the text. For all parametric tests, the data was assessed visually to ensure  
18 conformation to the necessary assumptions. All statistical analysis and visualisations were performed  
19 in the  $R$  environment v2.13.0 (<https://www.r-project.org>).

20

21
